# Supplementary material
Source: publisher figshare collection journal article supplement (https://karger.figshare.com/ndownloader/files/28880859)
Supplement: Supplementary file 1 [file 28880859]

| **Study** | **Sample Size** | **CRITERIA** | | **Ulcer** | **Nausea** | **Vomiting** | **Anorexia** | **Abdominal**  **Pain** | **Anemia** |  | **Neutropenia** | **Thrombocytopenia** | **ALP** | **AST** | **ALT** | **Bili** | **Alb** |
| --- | --- | --- | --- | --- | --- | --- | --- | --- | --- | --- | --- | --- | --- | --- | --- | --- | --- |
| Akinwande | 25 | CTCAE 3.0 | | 1 | NR | Grading Unknown | Grading Unknown | 2 | NR |  | NR | NR | NR | NR | NR | NR | NR |
| Buettner | 115 | CTCAE  SIR | | 0 | 0 | 0 | NR | 0 | NR |  | NR | NR | 1 | 2 | 0 | 2 | NR |
| Beuzit* | 45 |  | NR | | | | | | | | | | | | | | |
| Manceau* | 35 | CTCAE 4.0 | | NR | Not Shown | NR | NR | NR | NR |  | Not Shown | Not Shown | NR | NR | NR | NR | NR |
| Edeline 2019* | 41 | CTCAE 4.0 | | NR | 2 | 1 | NR | 5 | 8 |  | 21 | 10 | 1 | | | NR | NR |
| Edeline 2015* | 24 | NR | | NR | NR | NR | NR | NR | NR |  | NR | NR | G3 hepatic dysfunction: 1 | | | | NR |
| Riby* | 19 |  | NR | | | | | | | | | | | | | | |
| Camacho** | 9 |  | NR | | | | | | | | | | | | | | |
| Rafi** | 19 | CTCAE 3.0 | | 0 | NR | NR | NR | 0 | 0 |  | 0 | 0 | 0 | 0 | NR | 1 | 0 |
| Fillippi 2014*** | 17 | NR | | 0 | NR | Grading Unknown | NR | 0 | NR |  | NR | NR | NR | NR | NR | NR | NR |
| Fillipi 2019*** | 9 | CTCAE 4.0 | | 0 | 0 | 0 | NR | NR | NR |  | NR | NR | 0 | 0 | 0 | 0 | NR |
| Filippi 2020*** | 20 |  | NR | | | | | | | | | | | | | | |
| Mosconi 2020**** | 55 |  | NR | | | | | | | | | | | | | | |
| Mosconi 2016**** | 23 | CTCAE cited | | NR | NR | NR | NR | 0 | NR |  | NR | NR | NR | NR | | 0 | NR |
| Gangi | 85 | CTCAE 4.0 | | NR | NR | NR | NR | 0 | NR |  | NR | NR | 5 severe events. Not Specified. | | | | |
| Haug***** | 26 | CTCAE | | 0 | NS | NS | NR | NS | NR |  | NR | NR | NR | NS | NS | 0 | NR |
| Hoffman  ***** | 33 | NR | | NR | 0 | 0 | NR | 0 | NR |  | NR | NR | NR | 0 | 0 | 0 | NR |
| Mouli****** | 46 | CTCAE | | 1 | Grading Unknown | Grading Unknown | Grading Unknown | Grading Unknown | 0 |  | 0 | 0 | 0 | 0 | 0 | 3 | 4 |
| Ibrahim****** | 24 |  | | NS | Grading Unknown | Grading Unknown | Grading Unknown | 0 | NR |  | NR | NR | NR | NR | NR | NR | NR |
| Jia | 24 | CTCAE 4.0 | | 0 | 0 | 1 | 0 | 4 | NR |  | 0 | NR | 0 | 0 | 0 | 0 | NR |
| Koehler | 46 |  | NR | | | | | | | | | | | | | | |
| Levillain | 58 |  | NR | | | | | | | | | | | | | | |
| Reimer | 21 | CTCAE cited | | 0 | NR | NR | NR | NR | NR |  | NR | NR | NR | NR | NR | NR | NR |
| Saxena | 25 | CTCAE 3.0 | | 0 | Grading Unknown | Grading Unknown | Grading Unknown | 0 | NR |  | NR | NR | 1 | NR | NR | 1 | 1 |
| Shanker | 17 |  | NR | | | | | | | | | | | | | | |
| Soydal | 16 |  | NR | | | | | | | | | | | | | | |
| White | 61 | CTCAE | | 0 | 0 | 0 | NR | 0 | NR |  | 0 | 0 | NR | 1 | 0 | 1 | :0 |

**S. Table 3.1**: adverse events of radioembolization. CTCAE: Common Terminology Criteria for Adverse Events. NR: not reported by original studies. NS: data was not shown in the table because the outcome was reported by another larger study with overlapping patient sample. SIR: Society of Interventional Radiology
